# Supplementary material for: Bridging Thrombolysis Does Not Achieve Better Outcomes Compared to Direct Mechanical Thrombectomy in Stroke Due to Internal Carotid Artery Occlusion
Source: Research Square preprint supplement (doi:10.21203/rs.3.rs-7901947/v1), 2025-11-03
Supplement: Supplementary file 1 [file b7dde241b4bcef295fafd9d7.docx]

Results ICA stroke V1

Table 1. Baseline characteristics of study population

| Characteristic | Direct MT (N=174) | Bridging IVT  (N= 178) | Total (N=352) | p-value |
| --- | --- | --- | --- | --- |
| Age, Mean ± SD | 70.3 ± 14.4 | 69.3 ± 14.9 | 69.8 ± 14.6 | 0.500 |
| Sex, N (%)  Male  Female | 91 (52.3)  83 (47.7) | 88 (49.4)  90 (50.6) | 179 (50.9)  173 (49.1) | 0.591 |
| Country, N (%)  Germany  United Kingdom  Sweden | 102 (58.6)  17 (9.8)  55 (31.6) | 108 (60.7)  14 (7.9)  56 (31.5) | 210 (59.7)  31 (8.8)  111 (31.5) | 0.808 |
| Race | (all Caucasian) |  |  |  |
| Hypertension, N (%) | 83 (69.7) | 80 (65.6) | 163 (67.6) | 0.489 |
| Hyperlipidaemia, N (%) | 29 (25.9) | 16 (13.9) | 45 (19.8) | 0.024 |
| Diabetes mellitus, N (%) | 25 (21.0) | 21 (17.2) | 46 (19.1) | 0.454 |
| Atrial fibrillation, N (%) | 60 (50.4) | 39 (32.0) | 99 (41.1) | 0.004 |
| Previous stroke, N (%) | 14 (11.8) | 7 (5.7) | 21 (8.7) | 0.097 |
| Smoker | 18 (16.7) | 16 (14.4) | 34(15.5) | 0.645 |
| TOAST classification, N (%)  Large-artery atherosclerosis  Cardioembolic  Stroke of other determined aetiology  Stroke of undetermined aetiology | 45 (38.1)  61 (51.7)  8 (6.8)  4 (3.4) | 61 (50.8)  46 (38.3)  8 (6.7)  5 (4.2) | 106 (44.5)  107 (45.0)  16 (6.7)  9 (3.8) | 0.202 |
| Admission NIHSS, Median ± IQR | 16.0 ± 7.0 | 17.0 ± 8.0 | 16.0 ± 8.0 | 0.153 |
| Time from stroke onset to groin puncture | 351.3 ± 347.9 | 256.6 ± 159.8 | 298.5 ± 264.2 | 0.004 |
| Time from groin puncture to reperfusion | 62.0 ± 128.0 | 66.9 ± 120.9 | 64.5 ± 124.3 | 0.725 |

Table 2. Comparison of outcomes between direct MT and bridging IVT groups

| Outcome | Direct MT (N=174) | Bridging IVT  (N= 178) | Total (N=352) | p-value |
| --- | --- | --- | --- | --- |
| Discharge mRS, N (%)  0-2  3-6 | 21 (17.8)  97 (82.8) | 35 (28.9)  86 (71.1) | 56 (23.4)  183 (76.6) | 0.042 |
| Discharge mRS, N (%)  0-3  4-6 | 29 (24.6)  89 (75.4) | 46 (38.0)  75 (62.0) | 75 (31.4)  164 (68.4) | 0.025 |
| 90-day mRS, N (%)  0-2  3-6 | 44 (27.7)  115 (72.3) | 54 (33.5)  107 (66.5) | 98 (30.6)  222 (69.4) | 0.255 |
| 90-day mRS, N (%)  0-3  4-6 | 61 (38.4)  98 (61.6) | 71 (44.1)  90 (55.9) | 132 (41.3)  188 (58.8) | 0.297 |
| Inpatient mortality, N (%) | 41 (23.7) | 34 (19.2) | 75 (21.4) | 0.306 |
| TICI post-treatment, N (%)  0-2a (poor)  2b-3 (good) | 33 (19.4)  137 (80.6) | 35 (20.0)  140 (80.0) | 68 (19.7)  277 (80.3) | 0.891 |
| TICI post-treatment, N (%)  0-2b (poor)  2c-3 (good) | 78 (45.9)  92 (54.1) | 95 (54.3)  80 (45.7) | 173 (50.1)  172 (49.9) | 0.119 |
| sICH, N (%) | 23 (13.2) | 30 (16.9) | 53 (15.1) | 0.340 |
| SAH, N (%) | 8 (4.6) | 8 (4.5) | 16 (4.5) | 0.963 |
| Embolisation to new territory, N (%) | 11 (6.5) | 5 (3.0) | 16 (4.7) | 0.130 |

Table 3. Comparison of outcomes between bridging IVT and direct MT groups

| Outcome | Model 1  OR (91% CI); p-value | Model 2*  OR (91% CI); p-value |
| --- | --- | --- |
| Discharge mRS, N (%)  0-2 vs 3-6 | 1.88 (1.02 – 3.47); 0.044 | 1.77 (0.86 – 3.64); 0.123 |
| Discharge mRS, N (%)  0-3 vs 4-6 | 1.88 (1.08 – 3.29); 0.026 | 2.13 (1.10 – 4.13); 0.025 |
| 90-day mRS, N (%)  0-2 vs 3-6 | 1.32 (0.82 – 2.13); 0.255 | 1.34 (0.76 – 2.38); 0.317 |
| 90-day mRS, N (%)  0-3 vs 4-6 | 1.27 (0.81 – 1.98); 0.298 | 1.293 (0.75 – 2.22); 0.353 |
| Inpatient mortality, N (%) | 1.31 (0.78 – 2.18); 0.307 | 1.18 (0.65 – 2.13); 0.587 |
| mTICI post-treatment, N (%)  0-2a (poor) vs 2b-3 (good) | 1.04 (0.61 – 1.77); 0.891 | 1.10 (0.60 – 2.03); 0.763 |
| mTICI post-treatment, N (%)  0-2b (poor) vs 2c-3 (good) | 1.40 (0.92 – 2.14); 0.119 | 1.42 (0.88 – 2.29); 0.155 |
| sICH | 0.75 (0.42 – 1.35); 0.341 | 0.62 (0.31 – 1.25); 0.184 |
| SAH | 1.02 (0.38 – 2.79); 0.963 | 0.56 (0.15 – 2.06); 0.380 |
| Embolisation to new territory | 2.26 (0.77 – 6.64); 0.140 | 2.27 (0.64 – 8.07); 0.207 |

*adjusted for age, sex, NIHSS and time from stroke onset to groin puncture

Table 4. Subgroup analysis comparing outcomes of bridging IVT vs. direct MT in internal carotid artery stroke with underlying large artery atherosclerosis (n=105)

| Outcome | Direct MT (N=44) | Bridging IVT  (N= 61) | Total (N=105) | p-value |
| --- | --- | --- | --- | --- |
| Discharge mRS, N (%)  0-2  3-6 | 6 (13.6)  38 (86.4) | 17 (27.9)  44 (72.1) | 23 (21.9)  82 (78.1) | 0.082 |
| Discharge mRS, N (%)  0-3  4-6 | 8 (18.2)  36 (81.8) | 23 (37.7)  38 (62.3) | 31 (29.5)  74 (70.5) | 0.030 |
| 90-day mRS, N (%)  0-2  3-6 | 6 (14.0)  37 (86.0) | 20 (33.9)  39 (66.1) | 26 (25.5)  76 (74.5) | 0.022 |
| 90-day mRS, N (%)  0-3  4-6 | 13 (30.2)  30 69.8) | 23 (39.0)  36 (61.0) | 36 (35.3)  66 (64.7) | 0.361 |
| Inpatient mortality, N (%) | 15 (34.1) | 18 (29.5) | 33 (31.4) | 0.618 |
| TICI post-treatment, N (%)  0-2a (poor)  2b-3 (good) | 12 (27.3)  32 (72.7) | 14 (23.3)  46 (76.7) | 26 (25.0)  78 (75.0) | 0.647 |
| TICI post-treatment, N (%)  0-2b (poor)  2c-3 (good) | 28 (63.6)  16 (36.4) | 35 (58.3)  25 (41.7) | 63 (60.6)  41 (39.4) | 0.585 |
| sICH, N (%) | 8 (17.8) | 8 (13.1) | 16 (15.5) | 0.507 |
| SAH, N (%) | 5 (11.1) | 0 (0.0) | 5 (4.7) | 0.012 |
| Embolisation to new territory, N (%) | 3 (6.7) | 0 (0.0) | 3 (2.9) | 0.076 |
