# Supplementary material for: Bridging Thrombolysis Does Not Achieve Better Outcomes Compared to Direct Mechanical Thrombectomy in Stroke Due to Internal Carotid Artery Occlusion
Source: Research Square preprint supplement (doi:10.21203/rs.3.rs-7901947/v1), 2025-11-03
Supplement: Supplementary file 2 [file db76aa88ad4a795f8e6858fd.docx]

Supplementary Data

Table S1. Subgroup analysis comparing outcomes of bridging IVT vs. direct MT in internal carotid artery stroke in patients with mRS 0-1 (n=279)

| Outcome | Direct MT | Bridging IVT | Total | p-value |
| --- | --- | --- | --- | --- |
| Discharge mRS, N (%)  0-2  3-6 | 18 (19.4)  75 (80.6) | 29 (31.5)  63 (68.5) | 47 (25.4)  138 (74.6) | 0.057 |
| Discharge mRS, N (%)  0-3  4-6 | 25 (26.9)  68 (73.1) | 39 (42.4)  53 (57.6) | 64 (34.6)  121 (65.4) | 0.027 |
| 90-day mRS, N (%)  0-2  3-6 | 40 (31.5)  87 (68.5) | 50 (38.5)  80 (61.5) | 90 (35.0)  167 (65.0) | 0.242 |
| 90-day mRS, N (%)  0-3  4-6 | 55 (43.3)  72 (56.7) | 66 (50.8)  64 (49.2) | 121 (47.1)  136 (52.9) | 0.231 |
| Inpatient mortality, N (%) | 28 (20.6) | 19 (13.3) | 47 (16.8) | 0.103 |
| mTICI post-treatment, N (%)  0-2a (poor)  2b-3 (good) | 27 (20.5)  105 (79.5) | 33 (23.6)  107 (76.4) | 60 (22.1)  212 (77.9) | 0.536 |
| mTICI post-treatment, N (%)  0-2b (poor)  2c-3 (good) | 64 (48.5)  68 (51.5) | 83 (59.3)  57 (40.7) | 147 (54.0)  125 (46.0) | 0.074 |
| sICH, N (%) | 18 (13.2) | 24 (16.8) | 42 (15.1) | 0.407 |
| SAH, N (%) | 7 (5.1) | 6 (4.2) | 13 (4.7) | 0.796 |
| Embolisation to new territory, N (%) | 7 (5.3) | 5 (3.7) | 12 (4.5) | 0.528 |

Table S2. Subgroup analysis comparing outcomes of bridging IVT vs. direct MT in internal carotid artery stroke in patients of age ≤75 (n=204)

| Outcome | Direct MT | Bridging IVT | Total | p-value |
| --- | --- | --- | --- | --- |
| Discharge mRS, N (%)  0-2  3-6 | 11 (19.6)  45 (80.4) | 26 (37.1)  44 (62.9) | 37 (29.4)  89 (70.6) | 0.032 |
| Discharge mRS, N (%)  0-3  4-6 | 14 (25.0)  42 (75.0) | 33 (47.1)  37 (52.9) | 47 (37.3)  79 (62.7) | 0.011 |
| 90-day mRS, N (%)  0-2  3-6 | 28 (32.2)  59 (67.8) | 45 (45.0)  55 (55.0) | 73 (39.0)  114 (61.0) | 0.073 |
| 90-day mRS, N (%)  0-3  4-6 | 42 (48.3)  45 (51.7) | 60 (60.0)  40 (40.0) | 102 (54.5)  85 (45.5) | 0.108 |
| Inpatient mortality, N (%) | 18 (19.6) | 14 (12.7) | 32 (15.8) | 0.185 |
| mTICI post-treatment, N (%)  0-2a (poor)  2b-3 (good) | 17 (18.9)  73 (81.1) | 15 (13.9)  93 (86.1) | 32 (16.2)  166 (83.8) | 0.341 |
| mTICI post-treatment, N (%)  0-2b (poor)  2c-3 (good) | 45 (50.0)  45 (50.0) | 55 (50.9)  53 (49.1) | 100 (50.5)  98 (49.5) | 0.897 |
| sICH, N (%) | 11 (11.8) | 25 (22.5) | 36 (17.6) | 0.046 |
| SAH, N (%) | 6 (6.5) | 6 (5.4) | 12 (5.9) | 0.752 |
| Embolisation to new territory, N (%) | 6 (6.6) | 1 (1.0) | 7 (3.6) | 0.035 |

Table S3. Subgroup analysis comparing outcomes of bridging IVT vs. direct MT in internal carotid artery stroke in patients of age >75 (n=148)

| Outcome | Direct MT | Bridging IVT | Total | p-value |
| --- | --- | --- | --- | --- |
| Discharge mRS, N (%)  0-2  3-6 | 10 (16.1)  52 (83.9) | 9 (17.6)  42 (82.4) | 19 (16.8)  94 (83.2) | 0.830 |
| Discharge mRS, N (%)  0-3  4-6 | 15 (24.2)  47 (75.8) | 13 (25.5)  38 (74.5) | 28 (24.8)  85 (75.2) | 0.874 |
| 90-day mRS, N (%)  0-2  3-6 | 16 (22.2)  56 (77.8) | 9 (14.8)  52 (85.2) | 25 (18.8)  108 (81.2) | 0.272 |
| 90-day mRS, N (%)  0-3  4-6 | 19 (26.4)  53 (73.6) | 11 (18.0)  50 (82.0) | 30 (22.6)  103 (77.4) | 0.251 |
| Inpatient mortality, N (%) | 23 (28.4) | 20 (29.9) | 43 (29.1) | 0.846 |
| mTICI post-treatment, N (%)  0-2a (poor)  2b-3 (good) | 16 (20.0)  64 (80.0) | 20 (29.9)  47 (70.1) | 36 (24.5)  111 (75.5) | 0.167 |
| mTICI post-treatment, N (%)  0-2b (poor)  2c-3 (good) | 33 (41.3)  47 (58.8) | 40 (59.7)  27 (40.3) | 73 (49.7)  74 (50.3) | 0.026 |
| sICH, N (%) | 12 (14.8) | 5 (7.5) | 17 (11.5) | 0.163 |
| SAH, N (%) | 2 (2.5) | 2 (3.0) | 4 (2.7) | 0.847 |
| Embolisation to new territory, N (%) | 5 (6.3) | 4 (6.3) | 9 (6.3) | 0.985 |

Table S4. Subgroup analysis comparing outcomes of bridging IVT vs. direct MT in internal carotid artery stroke in patients of male gender (n=179)

| Outcome | Direct MT | Bridging IVT | Total | p-value |
| --- | --- | --- | --- | --- |
| Discharge mRS, N (%)  0-2  3-6 | 13 (22.4)  45 (77.6) | 21 (41.2)  30 (58.8) | 34 (31.2)  75 (68.8) | 0.035 |
| Discharge mRS, N (%)  0-3  4-6 | 17 (29.3)  41 (70.7) | 25 (49.0)  26 (51.0) | 42 (38.5)  67 (61.5) | 0.035 |
| 90-day mRS, N (%)  0-2  3-6 | 25 (29.4)  60 (70.6) | 33 (43.4)  43 (56.6) | 58 (36.0)  103 (64.0) | 0.065 |
| 90-day mRS, N (%)  0-3  4-6 | 35 (41.2)  50 (58.8) | 42 (55.3)  34 (44.7) | 77 (47.8)  84 (52.2) | 0.074 |
| Inpatient mortality, N (%) | 23 (25.3) | 10 (11.5) | 33 (18.5) | 0.018 |
| mTICI post-treatment, N (%)  0-2a (poor)  2b-3 (good) | 23 (25.6)  67 (74.4) | 12 (14.0)  74 (86.0) | 35 (19.9)  141 (80.1) | 0.054 |
| mTICI post-treatment, N (%)  0-2b (poor)  2c-3 (good) | 46 (51.1)  44 (48.9) | 40 (46.5)  46 (53.5) | 86 (48.9)  90 (51.1) | 0.542 |
| sICH, N (%) | 17 (18.7) | 12 (13.6) | 29 (16.2) | 0.360 |
| SAH, N (%) | 4 (4.4) | 3 (3.4) | 7 (3.9) | 0.734 |
| Embolisation to new territory, N (%) | 6 (6.7) | 3 (3.7) | 9 (5.3) | 0.377 |

Table S5. Subgroup analysis comparing outcomes of bridging IVT vs. direct MT in internal carotid artery stroke in patients of female gender (n=173)

| Outcome | Direct MT | Bridging IVT | Total | p-value |
| --- | --- | --- | --- | --- |
| Discharge mRS, N (%)  0-2  3-6 | 8 (13.3)  52 (86.7) | 14 (20.0)  56 (80.0) | 22 (16.9)  108 (83.1) | 0.312 |
| Discharge mRS, N (%)  0-3  4-6 | 12 (20.0)  48 (80.0) | 21 (30.0)  49 (70.0) | 33 (25.4)  97 (74.6) | 0.192 |
| 90-day mRS, N (%)  0-2  3-6 | 19 (25.7)  55 (74.3) | 21 (24.7)  64 (75.3) | 40 (25.2)  119 (74.8) | 0.888 |
| 90-day mRS, N (%)  0-3  4-6 | 26 (35.1)  48 (64.9) | 29 (34.1)  56 (65.9) | 55 (34.6)  104 (65.4) | 0.893 |
| Inpatient mortality, N (%) | 18 (22.0) | 24 (26.7) | 42 (24.4) | 0.472 |
| mTICI post-treatment, N (%)  0-2a (poor)  2b-3 (good) | 10 (12.5)  70 (87.5) | 23 (25.8)  66 (74.2) | 33 (19.5)  136 (80.5) | 0.029 |
| mTICI post-treatment, N (%)  0-2b (poor)  2c-3 (good) | 32 (40.0)  48 (60.0) | 55 (61.8)  34 (38.2) | 87 (51.5)  82 (48.5) | 0.005 |
| sICH, N (%) | 6 (7.2) | 18 (20.0) | 24 (13.9) | 0.015 |
| SAH, N (%) | 4 (4.8) | 5 (5.6) | 9 (5.2) | 0.828 |
| Embolisation to new territory, N (%) | 5 (6.2) | 2 (2.3) | 7 (4.2) | 0.209 |
